1

# 2 **A toolkit for studying *Varroa* genomics and transcriptomics:** 3 **Preservation, extraction, and sequencing library preparation**

4

5 Nonno Hasegawa<sup>1</sup>, Maeva Techer<sup>1</sup>, Alexander S. Mikheyev<sup>1,2</sup>

6

7 1 Okinawa Institute of Science and Technology, 1919-1 Tancha, Onna-son, 904-0495 Okinawa, Japan

8 2 Australian National University, Canberra, ACT, 2600, Australia

9

## 10 **Corresponding Authors**

11 Nonno Hasegawa [nonno.hasegawa3@oist.jp](mailto:nonno.hasegawa3@oist.jp)

12 Alexander S. Mikheyev [alexander.mikheyev@anu.edu.au](mailto:alexander.mikheyev@anu.edu.au)

## 13 **Abstract**

### 14 **Background:**

15 The honey bee parasite, *Varroa destructor*, is a leading cause of honey bee population declines. In addition  
16 to being an obligate ectoparasitic mite, *Varroa* carries several viruses that infect honey bees and act as  
17 the proximal cause of colony collapses. Nevertheless, until recently, studies of *Varroa* have been limited  
18 by the paucity of genomic tools. Lab- and field-based methods exploiting such methods are still nascent.  
19 This study developed a set of methods for preserving *Varroa* DNA and RNA from the field to the lab and  
20 processing them into sequencing libraries. We performed preservation experiments in which *Varroa* mites  
21 were immersed in TRIzol, RNeasy, and absolute ethanol for preservation periods up to 21 days post-  
22 treatment to assess DNA and RNA integrity.

23

### 24 **Results:**

25 For both DNA and RNA, mites preserved in TRIzol and RNeasy at room temperature degraded within 10  
26 days post-treatment. Mites preserved in ethanol at room temperature and 4°C remained intact through  
27 21 days. *Varroa* mite DNA and RNA libraries were created and sequenced for ethanol preserved samples,

28 15 and 21 days post-treatment. All DNA sequences mapped to the *V. destructor* genome at above 95% on  
29 average, while RNA sequences mapped to *V. destructor*, but also sometimes to high levels of the  
30 deformed-wing virus and to various organisms.

31

### 32 **Conclusion:**

33 Ethanolic preservation of field-collected mites is inexpensive and simple, and allows them to be shipped  
34 and processed successfully in the lab for a wide variety of sequencing applications. It appears to preserve  
35 RNA from both *Varroa* and at least some of the viruses it vectors.

36

### 37 **Keywords (max 10):**

38 Genomics, transcriptomics, *Varroa destructor*, preservation method, sequencing

39

## 40 **Background**

41 Honey bees are one of the most economically significant agricultural resources, contributing to crop  
42 pollination, as well as providing products such as honey, propolis, and beeswax, which also contribute to  
43 local economies [1]. The agricultural department of Canada reported that in 2016, honey bee pollination  
44 contributed 2.5 billion CAD to Canadian crops [2]; thus, the decline of honey bee populations gravely  
45 threatens agricultural output.

46 While honey bee declines are multifactorial, they have been accelerated by the pandemic spread of the  
47 ectoparasitic mite, *Varroa destructor*, which jumped hosts from the closely related eastern honey bee  
48 (*Apis cerana*) [1, 3]. Until recently, few genomic resources for *Varroa* existed, and how it evolved post-  
49 host switch remains poorly understood [4, 5]. Furthermore, *Varroa* mites vector several viruses that

50 impair the honey bee immune system, cause underdevelopment in honey bees, as well as cognitive  
51 impairment [6]. Viruses transmitted by *Varroa* are believed to be the primary driver of declining honey  
52 bee populations worldwide, exacerbating parasitism by *Varroa* mites themselves [1]. Many *Varroa*-  
53 associated viruses have been identified, most notably deformed-wing virus (DWV) [1, 7–9], acute bee-  
54 paralysis virus [8, 9], Kashmir bee virus [8, 9], and the black queen cell virus [8, 9]. However, much remains  
55 unknown about the biology of both *Varroa* and viruses it carries, as standard molecular methods to study  
56 them using genomic and transcriptomic tools have not been established [9].

57 The majority of honey bee viruses are single-stranded, positive-sense, RNA viruses. These commonly  
58 remain dormant, leaving the bees asymptomatic; thus, field diagnosis of honey bee viruses remains  
59 challenging [6, 9]. To understand viral loads of colonies, beekeepers must send samples to facilities that  
60 are equipped with proper instrumentation for diagnosis [9]. The optimal sampling method for live  
61 organisms for laboratory analysis is snap freezing and transporting on dry ice, which is frequently not  
62 possible for field workers and beekeepers [10]. Previous work exploring alternative storage conditions for  
63 honey bee RNA yielded degraded RNA in 70% ethanol, and whole honey bee RNA began to degrade within  
64 a week in RNAlater [10]. Campbell *et al.* [11] explored preservation of *Varroa* mites in RNAlater and its  
65 effect on RNA integrity. That study suggested that only when the mites are pierced does RNA remain  
66 intact, and did not explore other preservation solutions. Thus, there is limited published research  
67 regarding *Varroa* mite storage conditions and their effect on RNA and DNA integrity. Also, existing  
68 protocols for DNA and RNA extraction require pooling several mites to obtain enough material [11, 12].

69 We propose a new method to extract both DNA and RNA from a single mite, sufficient in both quality and  
70 quantity for downstream analysis, such as next-generation sequencing. This method allows individual  
71 analysis, which can be used to map viruses present in each individual rather than pooled samples.  
72 Standardizing a method to analyze viruses present in each *Varroa* mite will allow biogeographical mapping

73 to help visualize and track virus trends on a global scale. Here, we explore *Varroa* mite preservation  
74 conditions in TRIzol, RNAlater, and absolute ethanol for storage periods of up to 21 days, and their effects  
75 on DNA and RNA quality by mapping to the *V. destructor* reference genome [5] and transcriptome. We  
76 propose a more affordable and feasible method for fieldworkers who have limited immediate access to  
77 laboratory facilities or equipment.

## 78 **Results**

### 79 **DNA Quality and Library preparation**

80 Extracted *Varroa* mite DNA exhibited no trend in A260/280 values among the four treatments. In general,  
81 this method introduced contaminants into the RNA, with A260/280 values among all samples ranging  
82 from 1.76 to 3.35, with a mean of 2.76. High values indicate potential contamination, though they  
83 exceeded the threshold of 1.8 that is commonly used in laboratory practice for downstream applications  
84 [13]. We inspected samples treated with TRIzol and RNAlater using DNA electrophoresis and found that  
85 they were heavily degraded 10 days post-treatment. Mean total DNA yield was  $49.7 \pm 58$  (s.d.) ng. DNA  
86 generally remains intact for days or weeks of storage at room temperature; thus, our target for  
87 downstream analysis was the control group and ethanol groups from 21 days post-treatment to further  
88 analyze the quality by library prep, sequencing, and mapping to *V. destructor*. DNA libraries were  
89 successfully produced using a Nextera XT library preparation kit (catalog #FC-131-1096), uniquely indexed  
90 for sequencing.

91

### 92 **RNA Quality and Library preparation**

93 *Varroa* mite total RNA was extracted with a mean yield of  $2,157 \pm 2,570$  (s.d.) ng. RNA electrophoresis  
94 showed that RNA in samples preserved in ethanol remained intact even at room temperature, while

95 RNAlater and TRIzol preserved samples had degraded heavily in both 15- and 21-day samples (Fig. 1).  
96 Control group samples, which were snap-frozen and stored at -80°C, were also well-preserved. As  
97 RNAlater fails to penetrate mites unless their exoskeletons are punctured, degradation of RNA was  
98 expected [11]. *Varroa* mites float to the surface in TRIzol, as they are less dense than the solution; thus,  
99 RNA degradation was also expected in these samples. Total RNA libraries were prepared using an NEB  
100 low-input RNA library preparation kit (catalog #E6420), uniquely indexed for sequencing

101

## 102 **DNA and RNA Sequence Mapping**

103 *Varroa* mite DNA libraries acquired, on average,  $\sim 231,000 \pm 49,000$  (s.d.) sequences, whereas RNA  
104 libraries averaged approximately  $447,000 \pm 248,000$  (s.d.) sequences per library. Given the short-read  
105 length used in sequencing, inspection with FastQC revealed that there were essentially no adapters and  
106 that sequence quality was consistently high, so raw reads were not processed further. DNA libraries of  
107 mites preserved in ethanol for 15 and 21 days at room temperature and 4°C aligned to the *V. destructor*  
108 reference genome with a median of  $95.49 \pm 1.16$  (s.d.) % (Fig. 2). Of the mapped reads, approximately  $5.5$   
109  $\pm 0.74$  (s.d.) % were PCR duplicates, an artifact of library preparation. Since ribosomal RNA depletion was  
110 not performed before library preparation, we also conducted alignments to 18S (FJ911866.1) and 28S  
111 (FJ911801.1) rRNA to ensure that ribosomal RNA (rRNA) was not abundant, possibly swamping the mRNA  
112 sample. On average, there was less than 0.001% rRNA, allowing us to proceed with general mapping to  
113 *Varroa* mite gene models. RNA sequences from *Varroa* mites stored in ethanol at both room temperature  
114 and 4°C mapped inconsistently to *V. destructor*. Mapping to the *V. destructor* reference library varied from  
115 as little as 2% to as high as 76%. We used Kraken2 [14] to classify reads to other organisms, which mapped  
116 to various species (Fig. 2). Taxon classification with Kraken2 suggested higher mapping to DWV for  
117 individuals that didn't map well to the *V. destructor* reference library. There was no difference in the

118 mapping rates between RNA-seq libraries prepared by our approach vs. those from prior experiments  
119 that are available on the NCBI SRA database (Welch Two Sample t-test  $t_{16,4} = 0.12$ ,  $p = 0.91$ ).

120

## 121 Discussion

122 Transporting samples from the field to the lab for RNA processing often involves considerable stress and  
123 logistical complexity. To facilitate this process, we assessed effects of different preservation conditions on  
124 *Varroa* mite DNA and RNA integrity. Surprisingly, *Varroa* mite total DNA and RNA libraries mapped well to  
125 the *V. destructor* genome when bees were stored in absolute ethanol at room (Fig 2). This was a significant  
126 finding since for honey bees [10] and spiders [15], ethanol does not preserve RNA well. While butterfly  
127 [16], honey bee [10], and *Varroa* mite [11] RNA preserved well in RNAlater when specimens were ground,  
128 sliced, or pierced, intact specimens generally degraded within a few days post-treatment. Similar to these  
129 findings, we found that intact *Varroa* mite DNA and RNA stored in TRIzol and RNAlater started to degrade  
130 within 10 days, and possibly earlier.

131

132 As previously reported [17], DNA preserves well over longer periods than RNA, as long as the solution  
133 penetrates the specimen. *Varroa* mites floated to the surface in TRIzol; thus, mite DNA was not well  
134 preserved. Similarly, mites immersed in RNAlater were not well preserved because the solution does not  
135 penetrate the cuticle. Through RNA electrophoresis, we found that *Varroa* mite total RNA was completely  
136 degraded 2 weeks post-treatment (possibly earlier) when stored in TRIzol or RNAlater (Fig. 1). Surprisingly,  
137 RNA samples 21 days post-treatment immersed in ethanol at room temperature remained largely intact,  
138 allowing appropriate NGS library preparation and analysis. Ethanol RNA samples at both room  
139 temperature and 4°C mapped either to *V. destructor* or DWV, with a minimal amount of rRNA. Chen *et al.*  
140 [10] stated that whole honey bee RNA did not preserve well in RNAlater without slicing or crushing 1-  
141 week post-treatment, which is consistent with our results. Several other studies also suggest that spiders

142 [15] and butterflies [16] preserve well in RNAlater when specimens are crushed. However, RNA integrity  
143 varies when stored in ethanol between organisms. Spiders only preserved well when crushed, and not  
144 when immersed in ethanol as whole organisms [15].

145  
146 Mites must be punctured [11] if these solutions are to successfully preserve sample RNA, as for honey  
147 bees [10]. However, it is not practical for beekeepers to puncture each specimen, particularly in the field,  
148 and TRIzol and RNAlater are only available through vendors in laboratory reagents and are much more  
149 expensive than ethanol. For these reasons, we recommend the use of ethanol, which is readily available  
150 from chemical suppliers. *Varroa* mites yielded high-quality DNA and RNA for NGS analysis for weeks when  
151 stored in ethanol at room temperature or at 4°C, which should be sufficient for collection and shipping.  
152 Though we terminated the experiment at three weeks, it seems likely that both DNA and RNA are stable  
153 for much longer, given the minimal degradation we observed at 21 days.

154  
155 Although RNA libraries mapped well to *V. destructor* and DWV, there was still a portion of RNA sequence  
156 that was not classified. These unclassified sequences may contain new, unidentified RNA viruses that the  
157 *Varroa* mites are vectoring. They may also belong to organisms that have not been sequenced or may  
158 represent library preparation artifacts. Though it is beyond the scope of our current study, and not entirely  
159 feasible with 50-bp reads used in these experiments, exploring the unclassified region of RNA sequences  
160 will be beneficial in understanding the complicated host-parasite relationship of honey bees and *Varroa*  
161 mites, opening new avenues to honey bee health.

162  
163 There are several limitations we must take into account. Most importantly, our sample size is limited to  
164 n=6 per treatment per time point. However, the number of samples we processed for library preparation  
165 and sequencing resulted in high-quality mapping to the reference genome, and none of the samples

166 deviated strongly from the rest, suggesting we have a good representation of the treatments. Quality of  
167 ethanol must also be considered. In laboratory experiments, we require high-grade alcohol for quality  
168 control of samples. So, while we used high-grade absolute ethanol in this study, this quality of ethanol is  
169 not readily available worldwide. We suspect that lower quality ethanol, particularly if contaminated with  
170 impurities such as methanol, may harm preservation as they cause more hydration and further denature  
171 nucleic acids [18].

172

173 Although both DNA and RNA integrity were retained at room temperature when immersed in ethanol, it  
174 is more realistic and practical to store and ship samples within 2 weeks (15 days post-treatment). We  
175 advise beekeepers and field workers to store mite samples in the refrigerator when possible, and at room  
176 temperature when this is not possible. Samples may also be shipped without refrigeration, reducing  
177 shipping costs. Additionally, as we observed 21 days of stable storage, shipping delays should be  
178 considered if RNA integrity must be maintained for longer periods for high-quality NGS and other  
179 downstream analyses. In short, we found that a possible alternative to snap freezing *Varroa* mites and  
180 storing at -80°C is immersion in absolute ethanol for up to 21 days. By immersing in absolute ethanol,  
181 *Varroa* mite DNA and RNA are well preserved at both room temperature and at 4°C, which allow for more  
182 flexible sampling and storage conditions. We believe that methods presented in this study will lead to  
183 insights in *Varroa* genomics and population biology and will facilitate studies of the viruses vectored by  
184 *Varroa*.

185

## 186 **Conclusion**

187 We found that *Varroa* mite DNA and RNA were adequately preserved in absolute ethanol for up to 21  
188 days, and produced high quality DNA and RNA libraries when sequenced, mapping to the *Varroa* genome  
189 and to other taxa. On the contrary, when *Varroa* mites were preserved in TRIzol and RNAlater, the mite



190 DNA and RNA degraded within the first 10 days, possibly earlier, likely as a result of poor penetration  
191 through the exoskeleton. Ethanolic preservation of *Varroa* mites is inexpensive and uses a readily available  
192 reagent, thus allowing specimens to be shipped and processed for a wide variety of sequencing  
193 applications. In addition, ethanol also preserves viruses that *Varroa* vectors, most notably DWV. We  
194 propose that ethanolic preservation can replace cryopreservation, providing a more tractable method for  
195 preserving DNA and RNA quality.

196

## 197 **Methods**

### 198 **Mite Collection**

199 In March 2020, *Varroa* mites were collected from managed hives in Onna village, Okinawa by removing  
200 honey bees from 2 frames onto a tray with icing sugar, and shaking the tray to remove mites from honey  
201 bees (Fig. 3). From the site of collection to the laboratory, mites were in icing sugar. Once at the laboratory,  
202 we discarded dead mites. Mites were divided into the following treatment preservation conditions: 1)  
203 snap-frozen and stored at  $-80^{\circ}\text{C}$  2), immersed in absolute ethanol at room temperature, 3) immersed in  
204 absolute ethanol at  $4^{\circ}\text{C}$ , 4) immersed in TRIzol (Thermo Fisher Scientific, Tokyo, Japan) at room  
205 temperature, and 5) immersed in RNAlater (Thermo Fisher Scientific, Tokyo, Japan) at room temperature.  
206 When immersed in a solution, 500  $\mu\text{L}$  was used and each treatment consisted of 6 mites placed in separate  
207 tubes. Each treatment group was subjected to DNA and RNA extractions at intervals of 5, 10, 15, and 21  
208 days for subsequent DNA and RNA quantity and quality evaluations. Snap-freezing and storage at  $-80^{\circ}\text{C}$   
209 were chosen for the control group as it is a widely used method for specimen preservation [6, 15, 16]

210

## 211 **Mite Preparation for Extractions**

212 Mites were removed from the solution in which they were stored to new 1.5-mL tubes (Eppendorf catalog  
213 #0020125215) and chilled in liquid nitrogen. A clean, autoclaved pestle (Sigma Aldrich catalog #Z359947)  
214 was also chilled in liquid nitrogen to grind each mite in its tube. By visual inspection, ground mite powder  
215 that remained on the pestle was used for DNA extraction, ensuring that about half of the mite  
216 homogenates remain in the tubes for RNA extraction (Fig. 3).

217

## 218 **DNA Extraction**

219 Mite DNA was extracted using a QIAamp DNA Micro kit (Qiagen, Tokyo, Japan), according to the  
220 manufacturer's protocol. DNA quantity was determined using a Qubit fluorometer (Thermo Fisher  
221 Scientific, Tokyo, Japan), and quality was evaluated by the A260 / A280 ratio using a NanoDrop  
222 spectrophotometer (Thermo Fisher Scientific, Tokyo, Japan). Eluted DNA was stored at -20°C until further  
223 applications.

## 224 **RNA Extraction**

225 Mite RNA was extracted using TRIzol according to the manufacturer's protocol. Due to the small amount  
226 of mite present, the protocol was modified by using 50% of specified reagent volumes. Total RNA quality  
227 and quantity were evaluated using absorbance ratios of A230/260 and A230/280 on a Nanodrop  
228 spectrophotometer.

## 229 **Library Preparation**

### 230 DNA Library Preparation

231 DNA libraries were prepared using a Nextera XT DNA Library Prep kit (Illumina, Tokyo, Japan) according to  
232 the manufacturer's protocol, with optimization for mite DNA, using reagents at 20% of their specified  
233 volume. DNA was visualized by running electrophoresis on 1% agarose gels, for 20 min at 135 V

### 234 RNA Library Preparation

235 RNA libraries were prepared using an NEBNext Single Cell/ Low-Input RNA Library kit (New England  
236 BioLabs, Tokyo, Japan), according to the manufacturer's protocol. Purified cDNA was indexed with i5 and  
237 i7 primers (catalog #7600S, New England BioLabs, Tokyo, Japan), and then purified and size selected for a  
238 range of 400 to 2000 bp using 11% and 11.5% PEG and DynaBeads [19].

239

240 Both DNA and RNA libraries, as well as total RNA, were analyzed with a Bioanalyzer 2100 (Agilent, Tokyo,  
241 Japan) or a 4200 TapeStation (Agilent, Tokyo, Japan). For Bioanalyzer, high-sensitivity DNA kits and RNA  
242 pico kits (Agilent, Tokyo, Japan) were used, while for the TapeStation, a high-sensitivity D5000 kit (Agilent,  
243 Tokyo, Japan) was used.

## 244 **Sequencing and Analysis**

245 A MiSeq (Illumina, Tokyo, Japan) was used to perform both DNA and RNA sequencing, at 50 cycles and  
246 read with single read-only. We were interested in validating the protocol and estimating mapping  
247 percentages, so longer read lengths or higher coverage were not necessary. Raw sequence data from the  
248 MiSeq were first analyzed with FastQC [20] for quick quality control to see if adapter removal was  
249 necessary and to ensure that sequenced data was of sufficient quality. DNA sequence data were then  
250 analyzed using Bowtie2 [21], Samtools [22], and Picard tools [23] to map to the reference genome

251 (Vdes\_3.0 [5]) and to identify duplicates. RNA sequence data were analyzed using Bowtie2 and Samtools,  
252 and then taxonomically classified using Kraken [14]. We compared this protocol with previously published  
253 RNA-seq libraries deposited on NCBI, which were mapped to the reference genome in a similar way  
254 (SRR8867385 [24], SRR5109825 & SRR5109827 [8], SRR533974 [25], SRR5760830 & SRR5760851 [26],  
255 SRR8100122 & SRR8100123, SRR5377267 & SRR5337268, and SRR8864012 [27]).

256

## 257 **Abbreviations**

258 DWV - deformed wing virus

259

## 260 **Declarations**

261

262 **Ethics approval and consent to participate.** Not applicable. Permissions for sample collections were  
263 unnecessary as they are managed on site by colleagues.

264

265 **Consent for publication.** All authors have consented to publishing this work.

266

267 **Competing interests.** None.

268

269 **Funding.** ASM was supported by a Future Fellowship from the Australian Research Council (FT160100178)  
270 and a Kakenhi Grant-in-Aid for Scientific Research from the JSPS (18H02216). This work was additionally  
271 funded by the Okinawa Institute of Science and Technology Graduate University

272

273 **Author contributions.** All authors designed the study. NH and MT performed the laboratory work. NH  
274 performed the analysis and wrote the first manuscript draft, to which all authors contributed.

275

276 **Acknowledgements.** We are grateful to Miyuki Suenaga for help in the lab, the sequencing centre at OIST,  
277 and to the Honey & Coral project of the Onna Village for help in maintaining the bee colonies. We are  
278 grateful to Alexandra Sébastien for conducting pilot experiments that helped guide this project. We are  
279 grateful to Steven D. Aird for editing the manuscript.

280

281 **Data availability.** Raw sequence data are available under DDJB/NCBI BioProject PRJDB10252. To compare  
282 our results using the following sequences obtained from sequence read archive NCBI:

283 SRR8867385 [24]: RNA-seq of pooled *V. destructor* adults <https://www.ncbi.nlm.nih.gov/sra/?term=SRR8867385>

- 284 SRR5109825 & SRR5109827 [8]: Small RNA of *Varroa destructor*: South Africa  
285 <https://www.ncbi.nlm.nih.gov/sra/?term=SRR5109825>
- 286 SRR533974 [25]: RNA-seq of *Varroa destructor* <https://www.ncbi.nlm.nih.gov/sra/?term=SRR533974>
- 287 SRR5760830 & SRR5760851 [26]: GSM2686390: R245-9; *Varroa destructor*; RNA-Seq  
288 <https://www.ncbi.nlm.nih.gov/sra/?term=SRR5760830>
- 289 SRR8100122 & SRR8100123: RNA-seq of *Varroa destructor* <https://www.ncbi.nlm.nih.gov/sra/?term=SRR8100122>
- 290 SRR5377267 & SRR5337268: VD\_FemaleFound1 <https://www.ncbi.nlm.nih.gov/sra/?term=SRR5377267>
- 291 SRR8864012 [27]: RNA-seq of *Varroa destructor* adult female  
292 <https://www.ncbi.nlm.nih.gov/sra/?term=SRR8864012>

293  
294

## 295 REFERENCES

- 296 1. McMenamin AJ, Genersch E. Honey bee colony losses and associated viruses. *Current Opinion in Insect Science*. 2015;8:121–  
297 9.
- 298 2. Mukezangango J, Page S. Statistical overview of the Canadian honey and bee industry and the economic contribution of honey  
299 bee pollination, 2016. Horticulture and Cross Sectoral Division, Agriculture and Agri-Food Canada. 2017.
- 300 3. Vanengelsdorp D, Meixner MD. A historical review of managed honey bee populations in Europe and the United States and  
301 the factors that may affect them. *J Invertebr Pathol*. 2010;103 Suppl 1:S80–95.
- 302 4. Eliash N, Mikheyev A. *Varroa* mite evolution: a neglected aspect of worldwide bee collapses? *Curr Opin Insect Sci*. 2020;39:21–  
303 6.
- 304 5. Techer MA, Rane RV, Grau ML, Roberts JMK, Sullivan ST, Liachko I, et al. Divergent evolutionary trajectories following speciation  
305 in two ectoparasitic honey bee mites. *Communications Biology*. 2019;2:357.
- 306 6. Navajas M, Migeon A, Alaux C, Martin-Magniette M, Robinson G, Evans J, et al. Differential gene expression of the honey bee  
307 *Apis mellifera* associated with *Varroa destructor* infection. *BMC Genomics*. 2008;9:301.
- 308 7. de Miranda JR, Genersch E. Deformed wing virus. *J Invertebr Pathol*. 2010;103 Suppl 1:S48–61.
- 309 8. Remnant EJ, Shi M, Buchmann G, Blacquière T, Holmes EC, Beekman M, et al. A Diverse Range of Novel RNA Viruses in  
310 Geographically Distinct Honey Bee Populations. *J Virol*. 2017;91. doi:10.1128/JVI.00158-17.
- 311 9. Dietemann V, Nazzi F, Martin SJ, Anderson DL, Locke B, Delaplane KS, et al. Standard methods for varroa research. *J Apic Res*.  
312 2013;52:1–54.
- 313 10. Chen Y, Evans J, Hamilton M, Feldlaufer M. The influence of RNA integrity on the detection of honey bee viruses: molecular  
314 assessment of different sample storage methods. *J Apic Res*. 2007;46:81–7.
- 315 11. Campbell EM, McIntosh CH, Bowman AS. A Toolbox for Quantitative Gene Expression in *Varroa destructor*: RNA Degradation  
316 in Field Samples and Systematic Analysis of Reference Gene Stability. *PLoS One*. 2016;11:e0155640.
- 317 12. Gusachenko ON, Woodford L, Balbirnie-Cumming K, Campbell EM, Christie CR, Bowman AS, et al. Green Bees: Reverse Genetic  
318 Analysis of Deformed Wing Virus Transmission, Replication, and Tropism. *Viruses*. 2020;12. doi:10.3390/v12050532.

- 319 13. Koetsier G, Cantor E. A Practical Guide to Analyzing Nucleic Acid Concentration and Purity with Microvolume  
320 Spectrophotometers. New England Biolabs Inc. 2019.  
321 [https://www.bioke.com/blobs/downloads/NEB/MVS\\_Analysis\\_of\\_NA\\_Concentration\\_and\\_Purity.pdf](https://www.bioke.com/blobs/downloads/NEB/MVS_Analysis_of_NA_Concentration_and_Purity.pdf).
- 322 14. Wood DE, Salzberg SL. Kraken: ultrafast metagenomic sequence classification using exact alignments. *Genome Biol.*  
323 2014;15:R46.
- 324 15. Kono N, Nakamura H, Ito Y, Tomita M, Arakawa K. Evaluation of the impact of RNA preservation methods of spiders for de  
325 novo transcriptome assembly. *Mol Ecol Resour.* 2016;16:662–72.
- 326 16. Gayral P, Weinert L, Chiari Y, Tsagkogeorga G, Ballenghien M, Galtier N. Next-generation sequencing of transcriptomes: a  
327 guide to RNA isolation in nonmodel animals. *Mol Ecol Resour.* 2011;11:650–61.
- 328 17. Post RJ, Flook PK, Millest AL. Methods for the preservation of insects for DNA studies. *Biochem Syst Ecol.* 1993;21:85–92.
- 329 18. King JR, Porter SD. Recommendations on the use of alcohols for preservation of ant specimens (Hymenoptera, Formicidae).  
330 *Insectes Soc.* 2004;51:197–202.
- 331 19. Tin MM-Y, Economo EP, Mikheyev AS. Sequencing degraded DNA from non-destructively sampled museum specimens for  
332 RAD-tagging and low-coverage shotgun phylogenetics. *PLoS One.* 2014;9:e96793.
- 333 20. Bioinformatics B. FastQC: A quality control tool for high throughput sequence data. Babraham Bioinformatics. 2010.  
334 <http://www.bioinformatics.babraham.ac.uk/projects/fastqc/>. Accessed 5 Aug 2020.
- 335 21. Langmead B, Salzberg SL. Fast gapped-read alignment with Bowtie 2. *Nat Methods.* 2012;9:357–9.
- 336 22. Li H, Handsaker B, Wysoker A, Fennell T, Ruan J, Homer N, et al. The Sequence Alignment/Map format and SAMtools.  
337 *Bioinformatics.* 2009;25:2078–9.
- 338 23. Broad Institute. Picard Toolkit. Broad Institute, GitHub Repository. 2020. <http://broadinstitute.github.io/picard/>. Accessed 5  
339 Aug 2020.
- 340 24. Brettell LE, Schroeder DC, Martin SJ. RNAseq Analysis Reveals Virus Diversity within Hawaiian Apiary Insect Communities.  
341 *Viruses.* 2019;11. doi:10.3390/v11050397.
- 342 25. Cornman RS, Boncristiani H, Dainat B, Chen Y, vanEngelsdorp D, Weaver D, et al. Population-genomic variation within RNA  
343 viruses of the Western honey bee, *Apis mellifera*, inferred from deep sequencing. *BMC Genomics.* 2013;14:154.
- 344 26. Mondet F, Rau A, Klopp C, Rohmer M, Severac D, Le Conte Y, et al. Transcriptome profiling of the honeybee parasite *Varroa*  
345 destructor provides new biological insights into the mite adult life cycle. *BMC Genomics.* 2018;19:328.
- 346 27. Herrero S, Coll S, González-Martínez RM, Parenti S, Millán-Leiva A, González-Cabrera J. Identification of new viruses specific  
347 to the honey bee mite *Varroa destructor*. *Cold Spring Harbor Laboratory.* 2019;:610170. doi:10.1101/610170.

348

## 349 **Figure Legends**

350 **Figure 1:** Representative bioanalyzer result of *Varroa* mite total RNA, extracted 21 days post-treatment.  
351 Control samples that were snap-frozen and stored at -80°C show minimal noise and a clean 18S peak,  
352 while ethanol samples at room temperature and 4°C also showed a similar 18S peak; however, with more  
353 degradation products. Mites stored in RNAlater and TRIzol had degraded and did not show a peak at 18S,  
354 indicating that RNA preservation was not successful. This suggests that weeks of storage in ethanol, even  
355 at room temperature, have little effect on RNA integrity.

356

357 **Figure 2:** Alignment of RNA libraries from *Varroa* mite total RNA to *V. destructor* genome sequences, DWV,  
358 and other viruses. Some samples had fewer *V. destructor* reads, compared to DWV. Other viruses  
359 remained at a lower mapping percentage, and some reads did not map to any reference genome. Reads  
360 that remained unclassified may be organisms that have not yet been sequenced, library preparation  
361 artifacts, new RNA viruses for which *Varroa* mites serve as vectors, or microbes.

362  
363 **Figure 3:** Generalized experimental workflow. 1) *Varroa* mites were collected from an apiary located at  
364 the Onna village office in Okinawa, Japan, March, 2020. Mites were shaken off the honey bees by  
365 sprinkling powdered sugar on the frame. Bees were collected into a tray and shaken to remove mites. The  
366 tray containing powdered sugar and *Varroa* mites was transported back to the laboratory, within 30  
367 minutes, discarding dead mites on arrival. 2) Individual mites were placed in separate 1.5-mL  
368 microcentrifuge tubes and 3) were immersed in 500  $\mu$  L of a preservative solution or snap-frozen and  
369 stored at  $-80^{\circ}$  C until processing. 4) Incubation periods were 5, 10, 15, and 21 days in respective  
370 preservation methods. 5) Preservation solution was discarded after the incubation period, and 6) samples  
371 were immersed in liquid nitrogen for a minute, then 7) crushed with a sterile pestle that was also  
372 immersed in liquid nitrogen. Each sample was split in two tubes, 8a) mite dust on the pestle was washed  
373 with ATL buffer into a new tube and used for DNA extraction with a QIAamp DNA extraction kit and 8b)  
374 TRIzol was added to the tube containing mite dust and subjected to RNA extraction using TRIzol.  
375

376

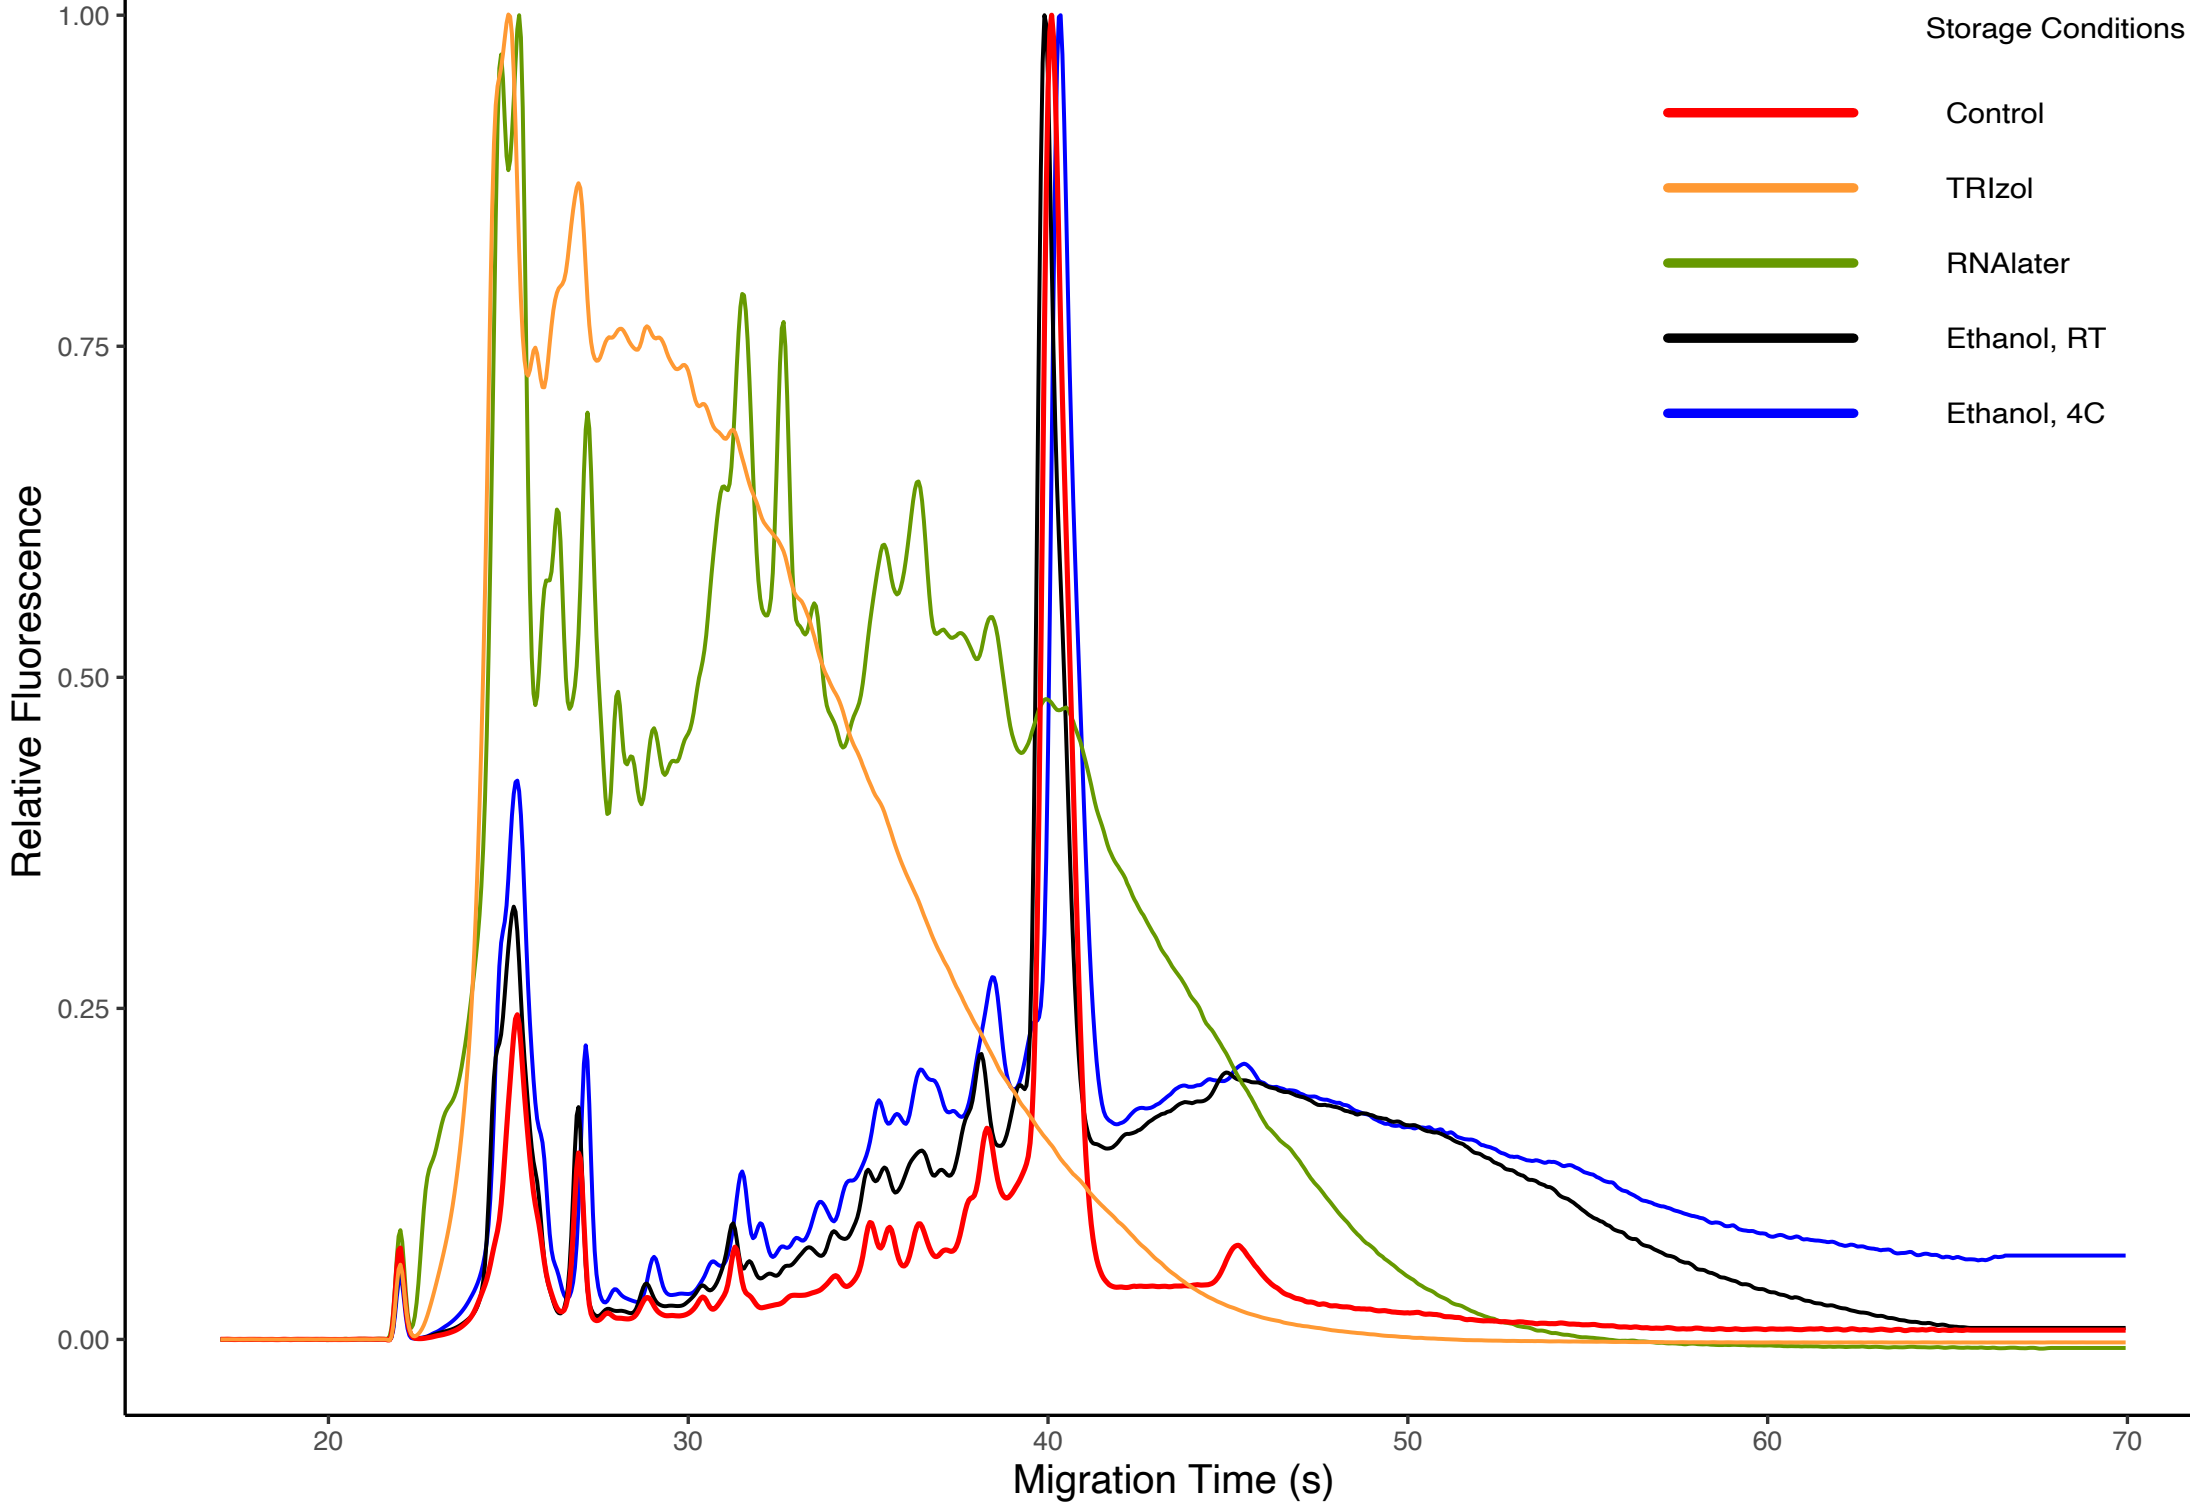



RNA Seq Alignment (%)

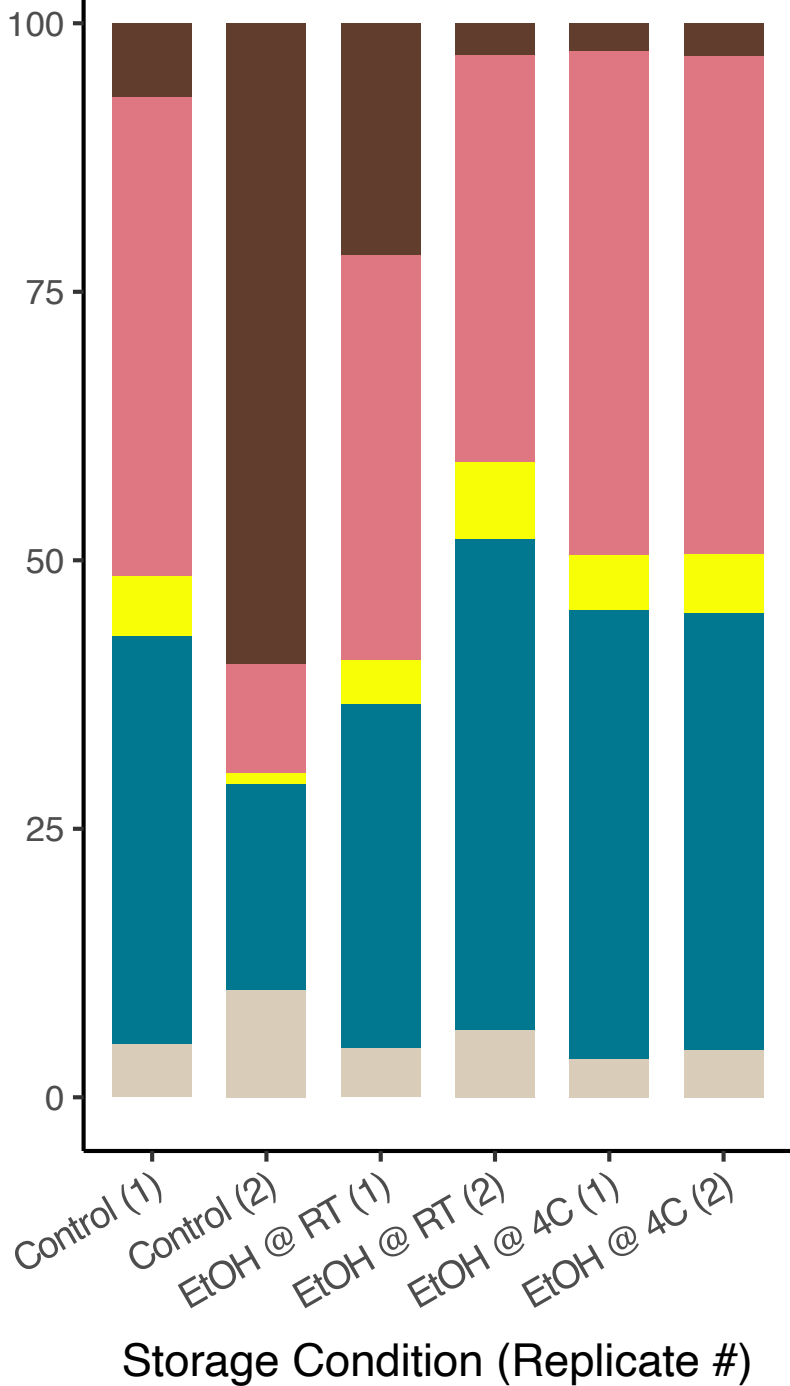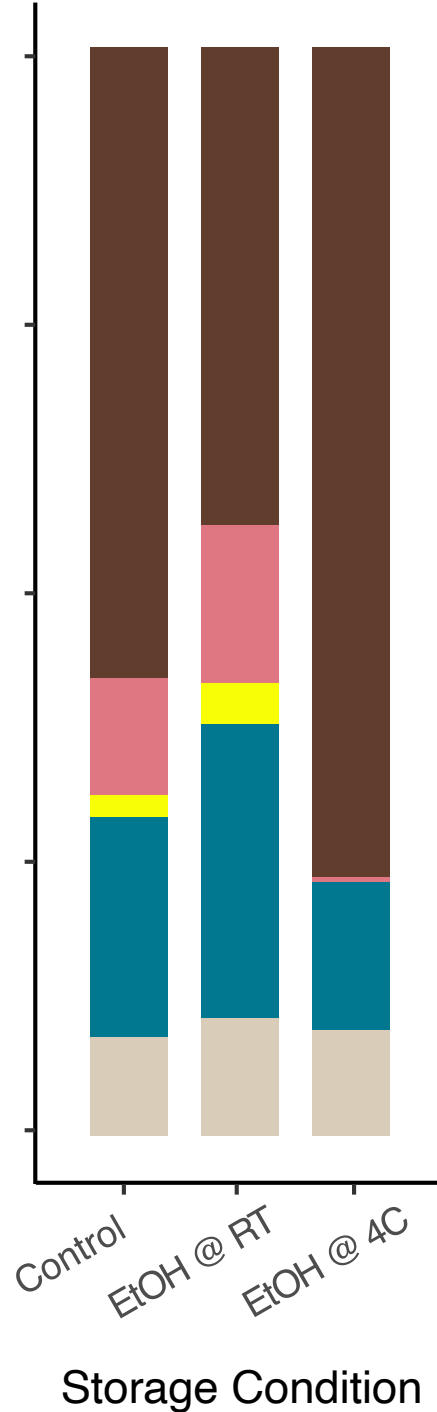

Varroa destructor Deformed Wing Virus Other Viruses Unclassified Other

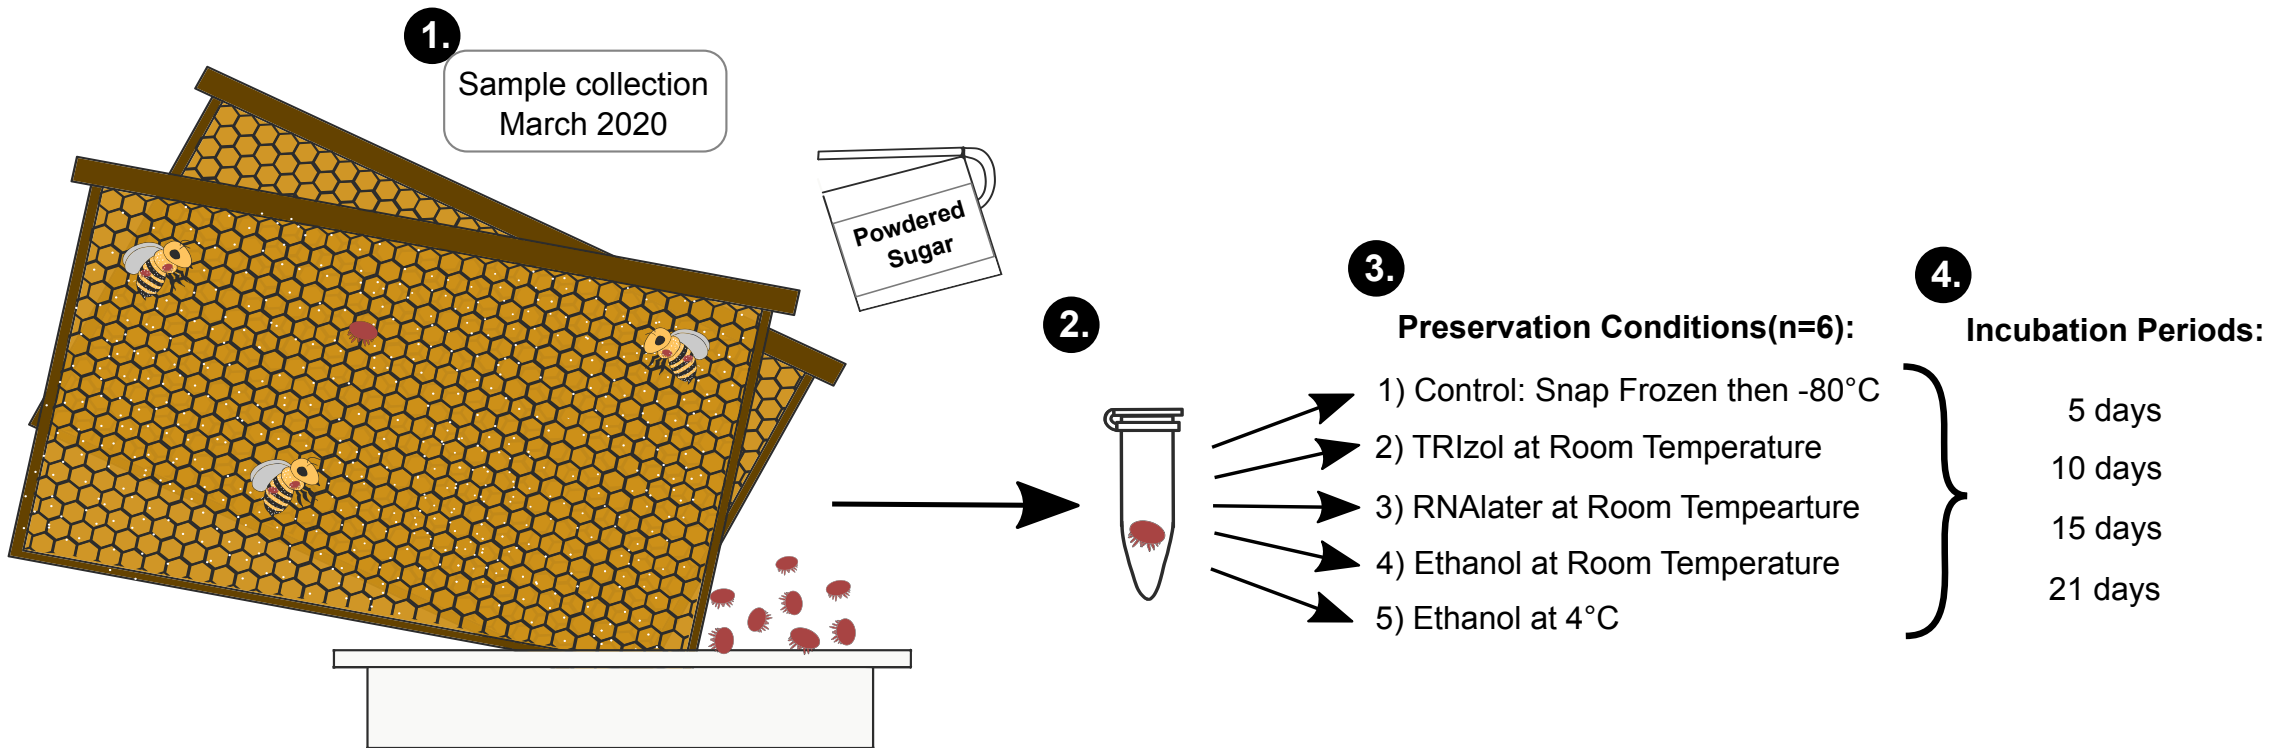

**Post Incubation...**

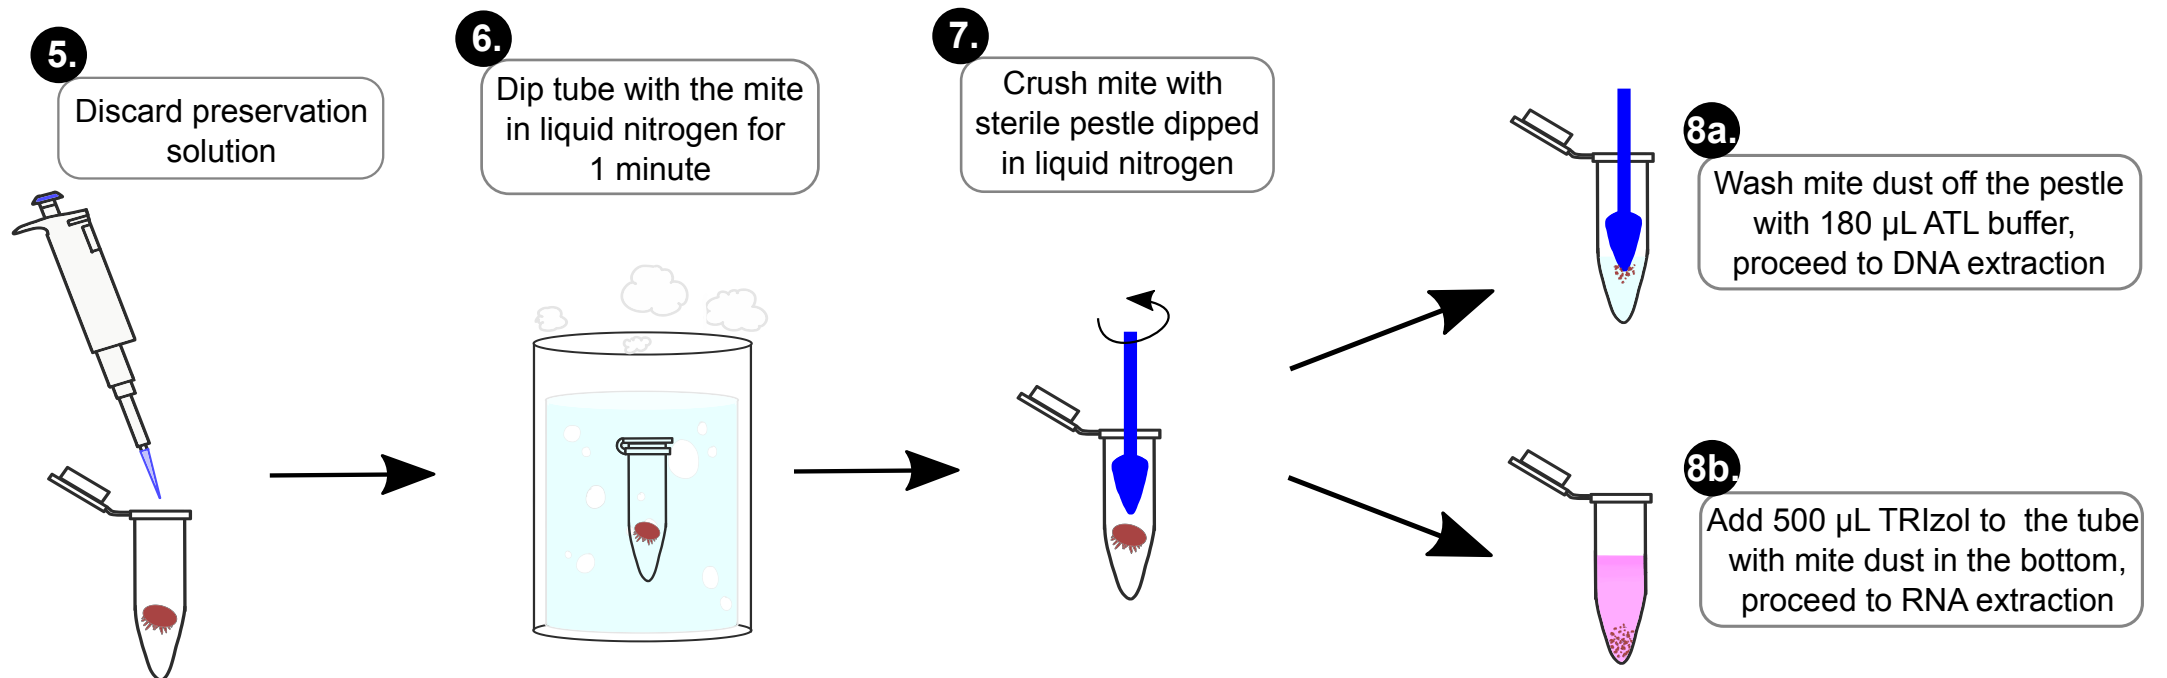

Source: https://www.biorxiv.org/content/10.1101/2020.08.17.255083v2.full.pdf
